# Supplementary material for: New data on photochemistry of the interstellar molecule: HNCS. Identification of the S⋯HCN complex
Source: Royal Society of Chemistry journal article supplement (doi:10.1039/c5cp03663a), 2015-01-01
Supplement: c5cp03663a1.pdf [file c5cp03663a1.pdf]

## Supplementary Information

New data on photochemistry of the interstellar molecule: HNCS. Identification of the S...HCN complex.

Justyna Krupa, Iwona Kosendiak, Maria Wierzejewska<sup>a</sup>

Faculty of Chemistry, University of Wrocław, Joliot-Curie 14, 50-383 Wrocław, Poland

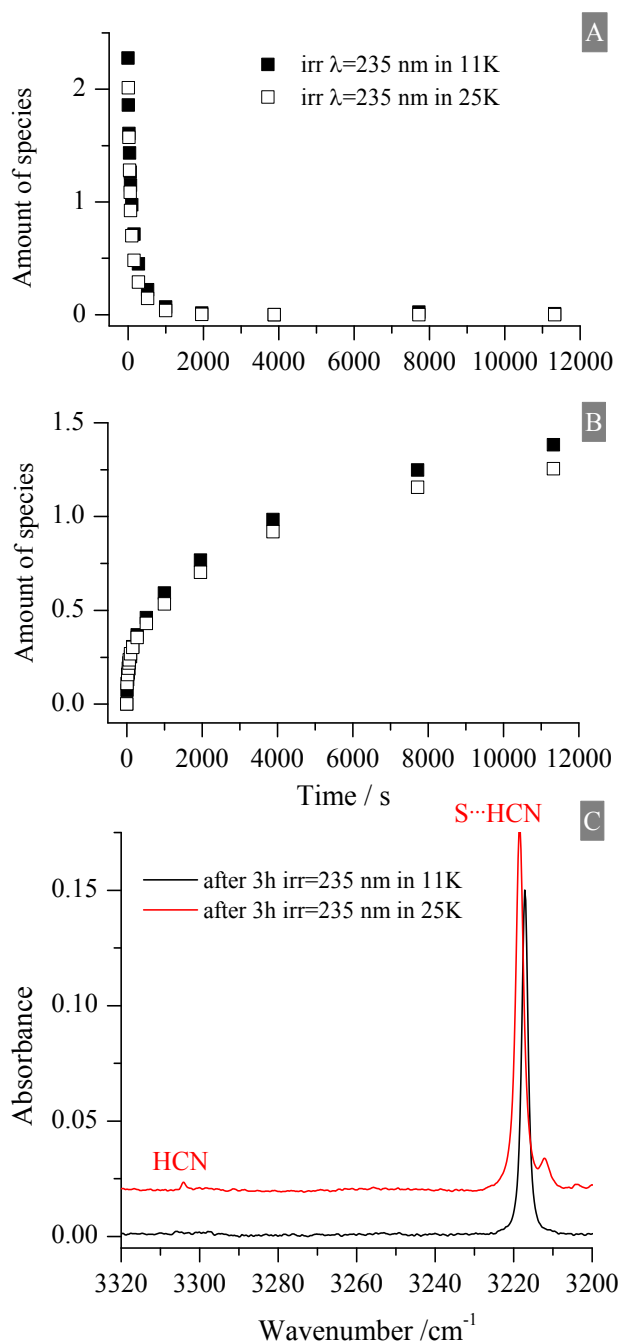

Fig S1 The  $\nu$  CH stretching region of the HNCS/Ar spectra obtained after irradiation at 235 nm at 11K and 25K.

Table S1. Energetic parameters and abundances of CHNS isomers calculated at MP2 and DFT levels with 6-311++G(3df,3pd) basis set.

| Isomer   | MP2                     |            |        | B3LYP                   |            |        | B2PLYP(D3)              |            |        |
|----------|-------------------------|------------|--------|-------------------------|------------|--------|-------------------------|------------|--------|
|          | $\Delta E_{\text{ZPE}}$ | $\Delta G$ | %      | $\Delta E_{\text{ZPE}}$ | $\Delta G$ | %      | $\Delta E_{\text{ZPE}}$ | $\Delta G$ | %      |
| HNCS     | 0.00                    | 0.00       | 100.00 | 0.00                    | 0.00       | 100.00 | 0.00                    | 0.00       | 100.00 |
| HSCN     | 14.58                   | 30.27      | 0.00   | 33.25                   | 47.05      | 0.00   | 41.84                   | 39.78      | 0.00   |
| HSNC     | 152.43                  | 171.19     | 0.00   | 145.81                  | 165.47     | 0.00   | 167.95                  | 165.33     | 0.00   |
| HCNS     | 125.41                  | 145.29     | 0.00   | 132.52                  | 159.17     | 0.00   | 144.47                  | 157.62     | 0.00   |
| HCSN     | 474.53                  | 458.39     | 0.00   | 491.81                  | 514.69     | 0.00   | 480.53                  | 479.04     | 0.00   |
| HNSC     | 484.62                  | 503.96     | 0.00   | 501.64                  | 519.76     | 0.00   | 506.36                  | 503.50     | 0.00   |
| c-C(H)NS | 200.67                  | 201.45     | 0.00   | 212.17                  | 213.03     | 0.00   | 210.32                  | 207.75     | 0.00   |
| c-S(H)CN | 231.09                  | 252.07     | 0.00   | 221.76                  | 246.42     | 0.00   | 249.89                  | 246.76     | 0.00   |
| c-N(H)CS | 323.91                  | 330.81     | 0.00   | 311.96                  | 320.48     | 0.00   | 326.93                  | 323.70     | 0.00   |

Table S2. Experimental wavenumbers ( $\text{cm}^{-1}$ ) of the HNCS, HSCN and HSNC isomers isolated in argon and nitrogen matrices. See also M. Wierzejewska and Z. Mielke, *Chem. Phys. Lett.*, 2001, **349**, 227 and M. Wierzejewska and R. Wiczorek, *Chem. Phys.* 2003, **287**, 169.

| HNCS      |                       |              | HSCN      |                       |              | HSNC      |                       |      |
|-----------|-----------------------|--------------|-----------|-----------------------|--------------|-----------|-----------------------|------|
| Ar matrix | N <sub>2</sub> matrix | Mode         | Ar matrix | N <sub>2</sub> matrix | Mode         | Ar matrix | N <sub>2</sub> matrix | Mode |
| 3508.5    | 3497.0<br>3487.5      | v NH         | 2581.0    | 2581.0<br>2580.0      | v SH         |           |                       |      |
| 1981.5    | 1996.5<br>1990.5      | v CN         | 2182.5    | 2182.0                | v CN         | 2064.0    | 2065.5                | v NC |
| 850.0     | 847.0                 | v CS         | 959.5     | 966.0<br>961.0        | $\delta$ HSC |           |                       |      |
| 578.0     |                       | $\delta$ NCS |           |                       |              |           |                       |      |
| 465.5     | 473.0                 | $\delta$ NCS |           |                       |              |           |                       |      |
| 987.0     |                       | comb.        |           |                       |              |           |                       |      |

Table S3. Calculated harmonic (unscaled) wavenumbers of the S...HNC and S...HCN complexes at UMP2 and UB3LYP level with 6-311++G(3df,3pd).

| UMP2 <sup>1</sup> |            |            |            | UB3LYP      |            |            |            | Mode        |
|-------------------|------------|------------|------------|-------------|------------|------------|------------|-------------|
| S...HNC           |            | S...HCN    |            | S...HNC     |            | S...HCN    |            |             |
| v                 | $\Delta v$ | v          | $\Delta v$ | v           | $\Delta v$ | v          | $\Delta v$ |             |
| 3666 (948)        | -186       | 3409 (248) | -56        | 3618 (1007) | -111       | 3372 (273) | -12        | v CH        |
| 2018 (10)         | -10        | 2035 (3)   | +4         | 2101 (32)   | +73        | 2192 (273) | +9         | v CN        |
| 589 (96)          | +124       | 740 (29)   | +36        | 530 (103)   | +2         | 791 (28)   | 0          | $\delta$ CH |
| 580 (84)          | +115       | 738(27)    | +34        | 530 (106)   | +2         | 790 (29)   | -1         | $\delta$ CH |

<sup>1</sup>calculated wavenumbers (intensities) of the HNC and HCN monomers are equal to 3852 (258), 2028 (34), 465 (125) and 3465 (78), 2031 (0), 704 (72) (MP2) and 3729 (255), 2083 (72), 528 (131) and 3384 (67), 2183 (2), 791 (37) (B3LYP), respectively

Table S4. BSSE and ZPE corrected interaction energies (kJ/mol), interatomic distances (Å) and electron density parameters of the intermolecular bond critical points (au) computed at the MP2 and B3LYP/6-311++G(3df,3pd) level.

| Complex                | $\Delta E_{\text{MP2}}$ | Interatomic distance<br>S...H | AIM parameters |                   |
|------------------------|-------------------------|-------------------------------|----------------|-------------------|
|                        |                         |                               | $\rho(r)$      | $\nabla^2\rho(r)$ |
| S...HCN                | -6.88                   | 2.828                         | 0.0100         | 0.0280            |
| S...HNC                | -10.25                  | 2.513                         | 0.0167         | 0.0414            |
| H <sub>2</sub> S...HCN | -6.95                   | 2.749                         | 0.0100         | 0.0270            |
| H <sub>2</sub> S...HNC | -10.60                  | 2.450                         | 0.0170         | 0.0412            |

| Complex                | $\Delta E_{\text{B3LYP}}$ | Interatomic distance<br>S...H | AIM parameters |                   |
|------------------------|---------------------------|-------------------------------|----------------|-------------------|
|                        |                           |                               | $\rho(r)$      | $\nabla^2\rho(r)$ |
| S...HCN                | -1.06                     | 2.819                         | 0.0088         | 0.0230            |
| S...HNC                | -8.52                     | 2.519                         | 0.0152         | 0.0364            |
| H <sub>2</sub> S...HCN | -0.54                     | 2.760                         | 0.0098         | 0.0253            |
| H <sub>2</sub> S...HNC | -7.39                     | 2.473                         | 0.0166         | 0.0384            |
